# Supplementary material
Source: publisher figshare collection journal article supplement (https://acs.figshare.com/ndownloader/files/3858901)
Supplement: Supplementary file 1 [file 3858901]

## Supplementary 3: Differences between the presented models

J.Zidek, J. Jancar, A. Milchev, T.A. Vilgis

October 30, 2014

Evolution of three networks during deformation is presented.

**cpc= 0.00** Physical network

**cpc= 0.70** Lightly crosslinked network

**cpc= 3.05** Strongly crosslinked network (Moderately crosslinked network with **cpc = 1.45** is visually similar to **3.05**).

In order to distinguish the structural elements, they were shown in different colors.

grey - flexible chains are grey.

red - covalent crosslinks.

green-physical crosslinks with covalent crosslinks (CCLs) in vicinity

blue - physical crosslinks without CCL in vicinity are blue.

The ratio of blue/green clusters (PCLs) colors does not have any relation to the elasticity. It is only for highlighting the differences in structure of the networks.

The files with label "3Dstereo" are stereoscopic movies in side-by-side format.
